# Supplementary material for: Iron Compounds in Anaerobic Degradation of Petroleum Hydrocarbons: A Review
Source: MDPI journal article supplement (doi:10.3390/microorganisms10112142), 2022-10-29
Supplement: s1 [file s1]

# Iron compounds in anaerobic degradation of petroleum hydrocarbons: a review

Ana R. Castro <sup>1,2</sup>, Gilberto Martins <sup>1,2</sup>, Andreia F. Salvador <sup>1,2</sup>, and Ana J. Cavaleiro <sup>1,2\*</sup>

<sup>1</sup> CEB—Centre of Biological Engineering, University of Minho, 4710-057 Braga, Portugal

<sup>2</sup> LABBELS—Associate Laboratory, 4704-553 Braga/Guimarães, Portugal

\* Correspondence: [acavaleiro@deb.uminho.pt](mailto:acavaleiro@deb.uminho.pt); Tel.: +351253604423

**Table S1.** Chemical formula, structure and aspect of various iron compounds

| Iron compounds | Chemical formula                         | Crystal structure                                                                                                                                                                                                                                        | Appearance                                                                                                                                                                                                                                             |
|----------------|------------------------------------------|----------------------------------------------------------------------------------------------------------------------------------------------------------------------------------------------------------------------------------------------------------|--------------------------------------------------------------------------------------------------------------------------------------------------------------------------------------------------------------------------------------------------------|
| Akaganeite     | $\beta$ -FeOOH                           | <br><a href="https://som.web.cmu.edu/structures2/S092-Akaganeite.html">https://som.web.cmu.edu/structures2/S092-Akaganeite.html</a>                                     | <br><a href="https://assignmentpoint.com/akaganeite-properties-and-occurrence/">https://assignmentpoint.com/akaganeite-properties-and-occurrence/</a>               |
| Feroxyhyte     | $\delta$ -FeOOH                          | <br><a href="https://commons.wikimedia.org/wiki/File:Structure_ferrihydrite.jpg">https://commons.wikimedia.org/wiki/File:Structure_ferrihydrite.jpg</a>               | <br><a href="http://www.msrblog.com/science/geographic-minerals/feroxyhyte.html">http://www.msrblog.com/science/geographic-minerals/feroxyhyte.html</a>           |
| Ferrihydrite   | $\text{Fe}(\text{OH})_3$                 | <br><a href="https://commons.wikimedia.org/wiki/File:Structure_ferrihydrite.jpg">https://commons.wikimedia.org/wiki/File:Structure_ferrihydrite.jpg</a>               | <br><a href="http://msrblog.com/assign/science/geographic-minerals/ferrihydrite.html">http://msrblog.com/assign/science/geographic-minerals/ferrihydrite.html</a> |
| Goethite       | $\alpha$ -FeOOH                          | <br><a href="http://www.diva-portal.org/smash/get/diva2:621003/FULLTEXT01.pdf">http://www.diva-portal.org/smash/get/diva2:621003/FULLTEXT01.pdf</a>                   | <br><a href="https://en.wikipedia.org/wiki/Goethite">https://en.wikipedia.org/wiki/Goethite</a>                                                                   |
| Hematite       | $\alpha$ -Fe <sub>2</sub> O <sub>3</sub> | <br><a href="https://en.wikipedia.org/wiki/Hematite#/media/File:Hematite_structure.jpg">https://en.wikipedia.org/wiki/Hematite#/media/File:Hematite_structure.jpg</a> | <br><a href="https://www.fishersci.com/shop/produ">https://www.fishersci.com/shop/produ</a>                                                                       |

| Iron compounds     | Chemical formula               | Crystal structure                                                                                                                                                                                                                                                                                                                                  | Appearance                                                                                                                                                                                                                                                                                                     |
|--------------------|--------------------------------|----------------------------------------------------------------------------------------------------------------------------------------------------------------------------------------------------------------------------------------------------------------------------------------------------------------------------------------------------|----------------------------------------------------------------------------------------------------------------------------------------------------------------------------------------------------------------------------------------------------------------------------------------------------------------|
|                    |                                |                                                                                                                                                                                                                                                                                                                                                    | cts/hematite-mineral-specimen-6/p-7203007                                                                                                                                                                                                                                                                      |
| Iron(II) chloride  | $\text{FeCl}_2$                | 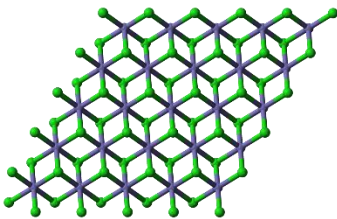<br><a href="https://en.wikipedia.org/wiki/Iron%28II%29_chloride">https://en.wikipedia.org/wiki/Iron%28II%29_chloride</a>                                                                                                                                         | <br><a href="https://www.alibaba.com/product-detail/Ferrous-chloride-tetrahydrate-with-FeCl2-4_1600261422277.html">https://www.alibaba.com/product-detail/Ferrous-chloride-tetrahydrate-with-FeCl2-4_1600261422277.html</a> |
| Iron(III) chloride | $\text{FeCl}_3$                | <br><a href="https://www.webelements.com/compounds/iron/iron_trichloride.html">https://www.webelements.com/compounds/iron/iron_trichloride.html</a>                                                                                                               | <br><a href="https://www.exirco.com/news/22/Ferri%20chloride%28solid%29?lang=en">https://www.exirco.com/news/22/Ferri%20chloride%28solid%29?lang=en</a>                                                                     |
| Iron(II) sulfate   | $\text{FeSO}_4$                | <br><a href="https://en.wikipedia.org/wiki/Iron%28II%29_sulfate">https://en.wikipedia.org/wiki/Iron%28II%29_sulfate</a>                                                                                                                                          | <br><a href="https://en.wikipedia.org/wiki/Iron%28II%29_sulfate">https://en.wikipedia.org/wiki/Iron%28II%29_sulfate</a>                                                                                                    |
| Iron(III) sulfate  | $\text{Fe}_2(\text{SO}_4)_3$   | <br><a href="https://commons.wikimedia.org/wiki/File:Iron%28III%29_sulfate-3D-balls-ionic.png">https://commons.wikimedia.org/wiki/File:Iron%28III%29_sulfate-3D-balls-ionic.png</a>                                                                             | <br><a href="https://mubychem.net/ferric-sulfate.php">https://mubychem.net/ferric-sulfate.php</a>                                                                                                                         |
| Maghemite          | $\gamma\text{-Fe}_2\text{O}_3$ | <br><a href="https://www.researchgate.net/publication/299510704_Theoretical_studies_on_structural_properties_of_Iron_Oxides/figures">https://www.researchgate.net/publication/299510704_Theoretical_studies_on_structural_properties_of_Iron_Oxides/figures</a> | <br><a href="https://en.wikipedia.org/wiki/Maghemite">https://en.wikipedia.org/wiki/Maghemite</a>                                                                                                                         |

| Iron compounds | Chemical formula                                       | Crystal structure                                                                                                                                                                                                                                                      | Appearance                                                                                                                                                                                                                                                         |
|----------------|--------------------------------------------------------|------------------------------------------------------------------------------------------------------------------------------------------------------------------------------------------------------------------------------------------------------------------------|--------------------------------------------------------------------------------------------------------------------------------------------------------------------------------------------------------------------------------------------------------------------|
| Magnetite      | $\text{Fe}_3\text{O}_4$                                | 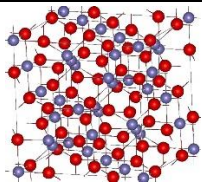<br><a href="https://en.wikipedia.org/wiki/File:Magnetite_structure.jpg">https://en.wikipedia.org/wiki/File:Magnetite_structure.jpg</a>                                               | <br><a href="https://www.amazon.com/Raw-Magnetite-Mineral-Specimen-Classrooms/dp/B081BCMD82">https://www.amazon.com/Raw-Magnetite-Mineral-Specimen-Classrooms/dp/B081BCMD82</a> |
| Pyrite         | $\text{FeS}_2$                                         | <br><a href="https://en.wikipedia.org/wiki/Pyrite">https://en.wikipedia.org/wiki/Pyrite</a>                                                                                           | <br><a href="https://www.britannica.com/science/pyrite">https://www.britannica.com/science/pyrite</a>                                                                           |
| Siderite       | $\text{FeCO}_3$                                        | <br><a href="http://scienceculture.com/advancedpoll/GCSE/sedimentaryrocks.html">http://scienceculture.com/advancedpoll/GCSE/sedimentaryrocks.html</a>                                | <br><a href="https://en.wikipedia.org/wiki/Siderite">https://en.wikipedia.org/wiki/Siderite</a>                                                                                |
| Vivianite      | $\text{Fe}_3(\text{PO}_4)_2 \cdot 8\text{H}_2\text{O}$ | <br><a href="https://mineralcollectionblog.wordpress.com/2018/07/31/vivianite-group-minerals/">https://mineralcollectionblog.wordpress.com/2018/07/31/vivianite-group-minerals/</a> | <br><a href="https://en.wikipedia.org/wiki/Vivianite">https://en.wikipedia.org/wiki/Vivianite</a>                                                                             |
